# Supplementary material for: Determination of trace phenolic acids in fruit juice samples using multiple monolithic fiber solid-phase microextraction coupled with high-performance liquid chromatography
Source: Royal Society of Chemistry journal article supplement (doi:10.1039/c6ay00934d), 2016-01-01
Supplement: c6ay00934d1.pdf [file c6ay00934d1.pdf]

*Supporting information*

**Determination of trace phenolic acids in fruit juice samples using  
multiple monolithic fiber solid-phase microextraction coupled with  
high performance liquid chromatography**

Miao Pei, Xiaojia Huang\*

*State Key Laboratory of Marine Environmental Science, Key Laboratory of the  
Ministry of Education for Coastal and Wetland Ecosystem, College of the  
Environment and Ecology, Xiamen University, Xiamen 361005, China*

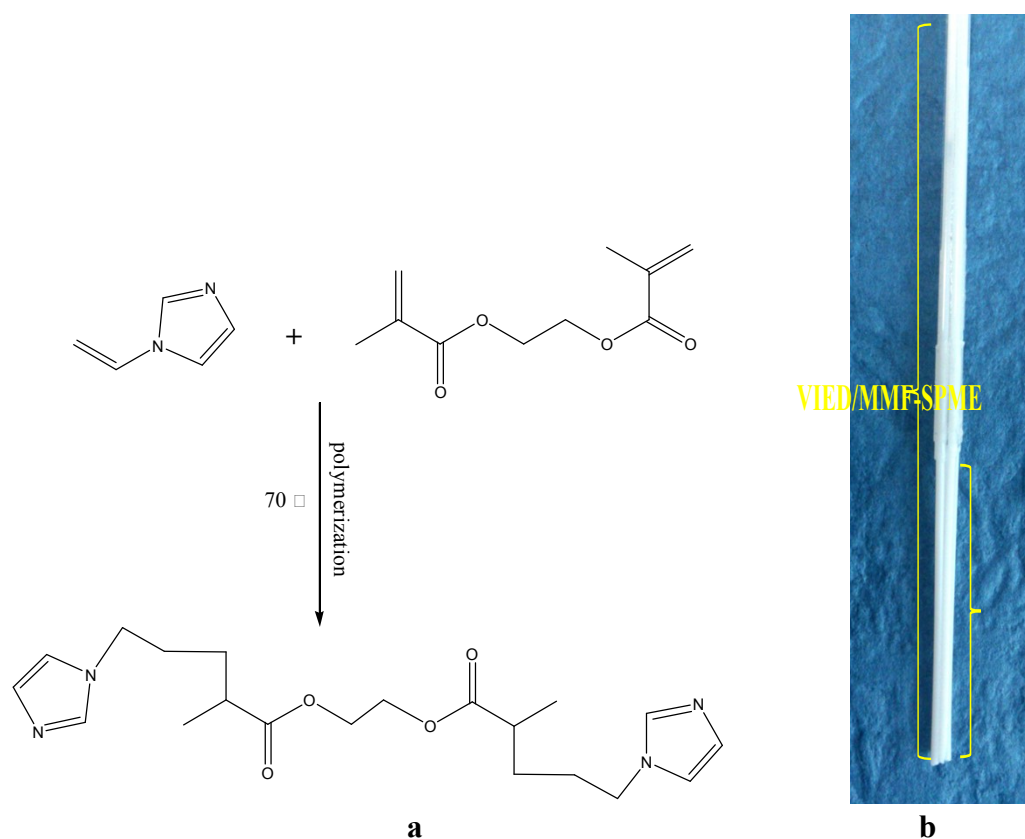

**Fig.S1.** The reaction sketch of poly (vinylimidazole-*co*-ethylene dimethacrylate) monolith (a) and the photo of VIED/MMF-SPME (b).

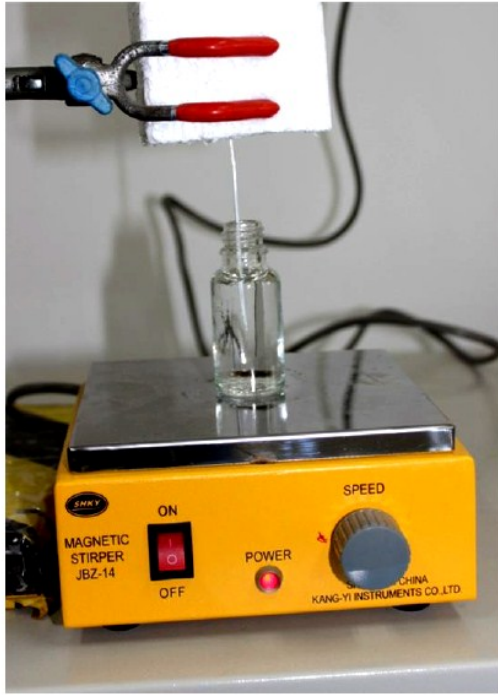

a

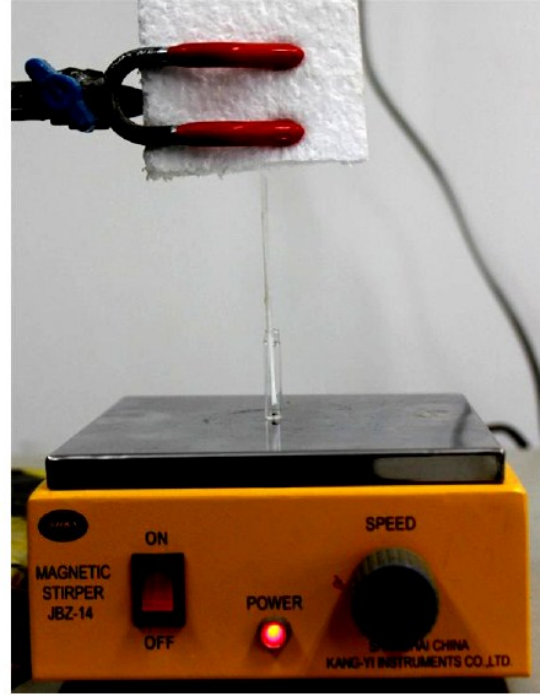

b

**Fig.S2.** The adsorption (a) and desorption (b) procedure of VIED/MMF-SPME
